# Supplementary material for: Interaction of Corroding Iron with Eight Bentonites in the Alternative Buffer Materials Field Experiment (ABM2)
Source: MDPI journal article supplement (doi:10.3390/min11080907), 2021-08-22
Supplement: s1 [file s1]

## **SUPPLEMENTARY MATERIAL**

related to

### **Interaction of corroding iron with seven bentonites in the alternative buffer materials field experiment (ABM2)**

Paul Wersin, Jebril Hadi\*, Andreas Jenni, Daniel Svensson, Jean-Marc Grenèche, Patrik Sellin, Olivier X. Leupin

## **S4 Mössbauer spectrometry data**

### **Contents**

|      |                                                    |    |
|------|----------------------------------------------------|----|
| S4-1 | MX80 (Block #8) .....                              | 1  |
| S4-2 | Ibecoseal (Block #11) .....                        | 2  |
| S4-3 | MX80/quartz (Block #25).....                       | 4  |
| S4-4 | Deponit (Block #26) .....                          | 7  |
| S4-5 | Fe distribution inferred from Mössbauer data ..... | 11 |

# **S4-1 MX80 (Block #8)**

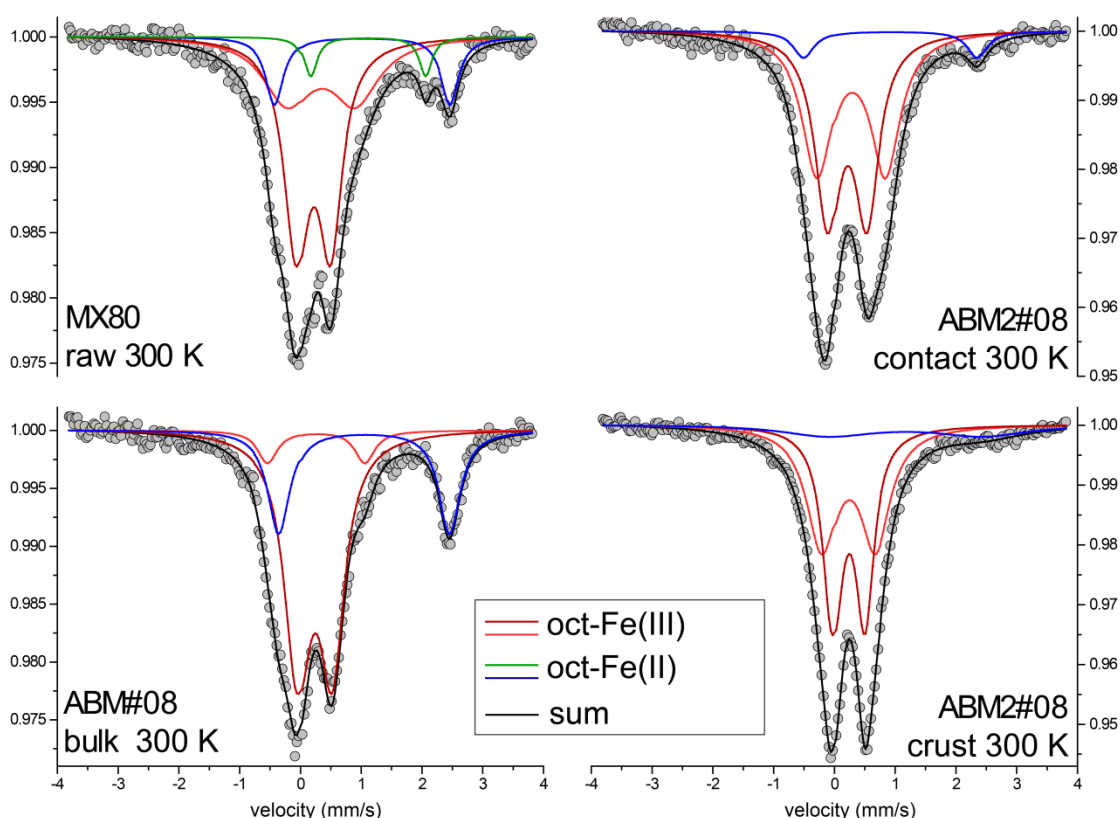

Fig. S4-1 Room temperature spectra of the raw MX80 bentonite used in ABM2 experiment and three samples from block ABM2#08 (hyperfine parameters displayed in Table S4-1)

Table S4-1 Refined values of Mössbauer parameters and doublet structural attributions for the raw MX80 sample and the samples from block ABM2#08

| Hyperfine parameters |          |      |         | Attribution    |
|----------------------|----------|------|---------|----------------|
| I.S.                 | F.W.H.M. | Q.S. | Area(%) |                |
| raw                  |          |      |         |                |
| 0.46                 | 0.95     | 1.10 | 32      | HS-oct-Fe(III) |
| 0.32                 | 0.47     | 0.54 | 50      | HS-oct-Fe(III) |
| 1.13                 | 0.35     | 2.85 | 13      | HS-oct-Fe(II)  |
| 1.21                 | 0.25     | 1.89 | 5       | HS-oct-Fe(II)  |
| Bulk                 |          |      |         |                |
| 0.38                 | 0.40     | 1.57 | 8       | HS-oct-Fe(III) |
| 0.35                 | 0.50     | 0.55 | 66      | HS-oct-Fe(III) |
| 1.17                 | 0.43     | 2.78 | 26      | HS-oct-Fe(II)  |
| contact              |          |      |         |                |
| 0.35                 | 0.59     | 0.85 | 44      | HS-oct-Fe(III) |
| 0.35                 | 0.37     | 0.51 | 44      | HS-oct-Fe(III) |
| 1.29                 | 1.80     | 2.53 | 13      | HS-oct-Fe(II)  |
| Crust                |          |      |         |                |
| 0.40                 | 0.59     | 1.10 | 46      | HS-oct-Fe(III) |
| 0.32                 | 0.48     | 0.62 | 48      | HS-oct-Fe(III) |
| 1.04                 | 0.41     | 2.82 | 6       | HS-oct-Fe(II)  |

I.S. = Isomer shift value relative to that of the  $\alpha$ -Fe at 300 K.  
F.W.H.M = Full width of line at half of its maximum intensity.  
Q.S. = Quadrupolar splitting

## S4-2 Ibecoseal (Block #11)

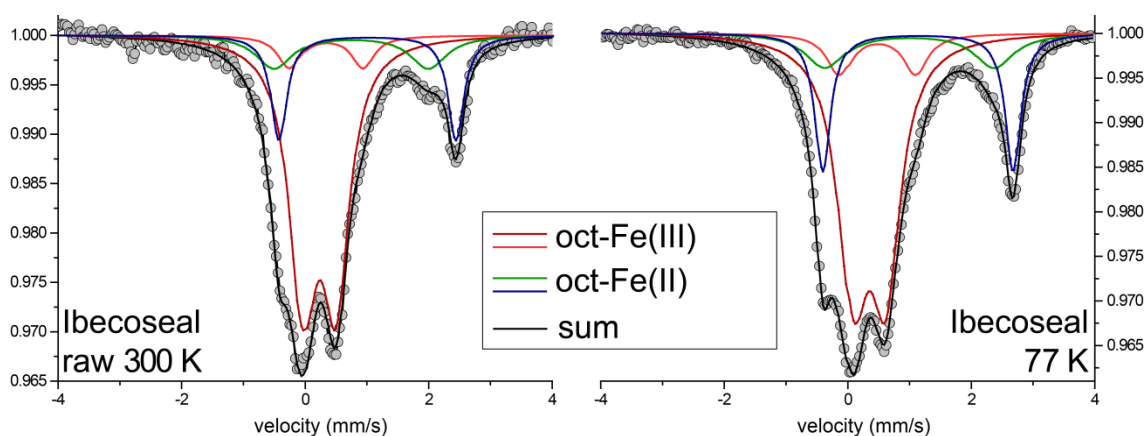

Fig. S4-2 Room temperature and 77 K Mössbauer spectra of the raw Ibecoseal bentonite used in ABM2 experiment (hyperfine parameters displayed in Table S4-2)

Table S4-2 Refined values of Mössbauer parameters and doublet structural attributions for the raw Ibecoseal sample.

| Hyperfine parameters |          |      |         | Attribution    |
|----------------------|----------|------|---------|----------------|
| I.S.                 | F.W.H.M. | Q.S. | Area(%) |                |
| 300 K                |          |      |         |                |
| 0.47                 | 0.57     | 0.52 | 60      | HS-oct-Fe(III) |
| 0.61                 | 0.48     | 1.21 | 9       | HS-oct-Fe(III) |
| 1.13                 | 0.77     | 2.71 | 12      | HS-oct-Fe(II)  |
| 1.27                 | 0.31     | 3.05 | 19      | HS-oct-Fe(II)  |
| 77 K                 |          |      |         |                |
| 0.35                 | 0.52     | 0.52 | 64      | HS-oct-Fe(III) |
| 0.46                 | 0.44     | 1.17 | 7       | HS-oct-Fe(III) |
| 0.87                 | 0.71     | 2.47 | 12      | HS-oct-Fe(II)  |
| 1.13                 | 0.32     | 2.83 | 17      | HS-oct-Fe(II)  |

I.S. = Isomer shift value relative to that of the  $\alpha$ -Fe at 300 K.

F.W.H.M = Full width of line at half of its maximum intensity.

Q.S. = Quadrupolar splitting

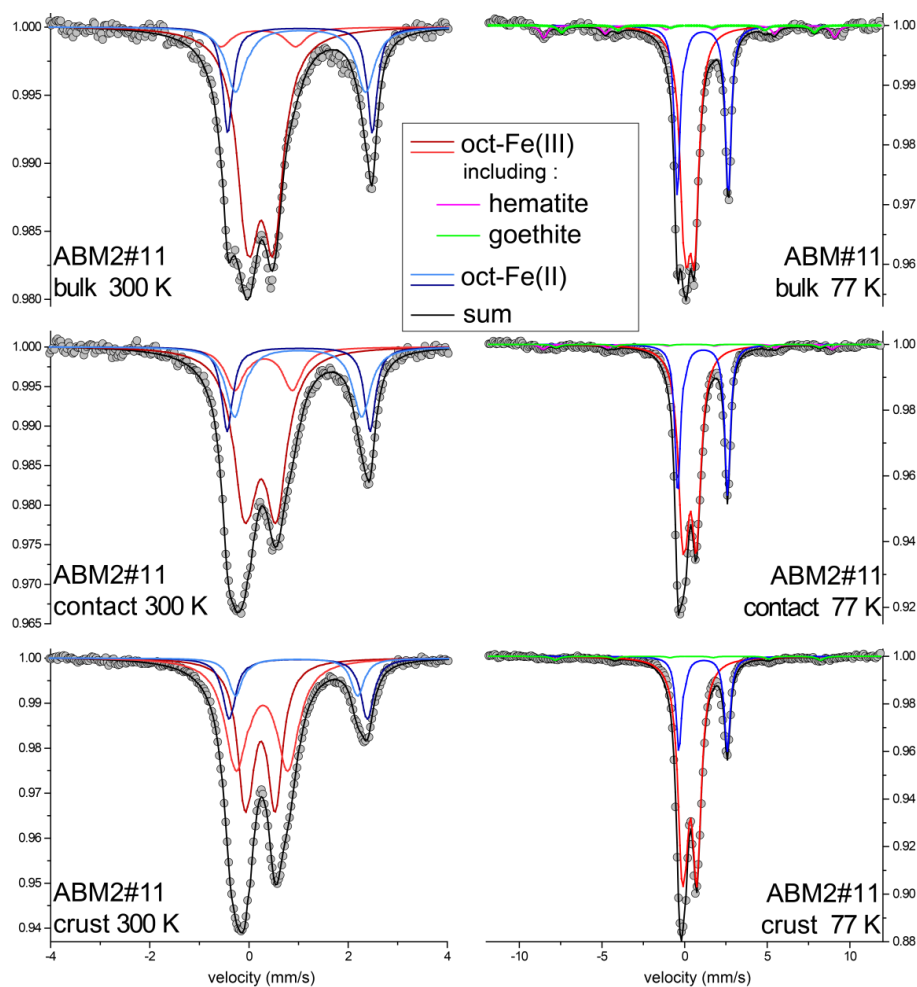

Fig. S4-3 Room temperature and 77 K Mössbauer spectra of a series of 3 samples from block ABM2#11. The hyperfine parameters are displayed in

Table S4-3.

Table S4-3 Refined values of Mössbauer parameters and doublet structural attributions for the sample collected on block ABM2#11 (Ibecoséal)

| Hyperfine parameters |          |         |                 |         | Attribution    |
|----------------------|----------|---------|-----------------|---------|----------------|
| I.S.                 | F.W.H.M. | Q.S./2ε | $B_{\text{hf}}$ | Area(%) |                |
| Bulk                 |          |         |                 |         |                |
| 300 K                |          |         |                 |         |                |
| 0.35                 | 0.50     | 0.49    |                 | 60      | HS-oct-Fe(III) |
| 0.31                 | 0.50     | 1.47    |                 | 6       |                |
| 1.15                 | 0.24     | 2.88    |                 | 16      | HS-oct-Fe(II)  |
| 1.16                 | 0.45     | 2.59    |                 | 18      |                |
| 77 K                 |          |         |                 |         |                |
| 0.46                 | 0.64     | 0.52    |                 | 57      | HS-oct-Fe(III) |
| 1.26                 | 0.42     | 2.99    |                 | 34      | HS-oct-Fe(II)  |
| 0.47                 | 0.50     | -0.04   | 54.4            | 6       | hematite       |
| 0.48                 | 0.50     | -0.22   | 47.2            | 3       | goethite       |
| Contact              |          |         |                 |         |                |
| 300 K                |          |         |                 |         |                |
| 0.34                 | 0.37     | 0.57    |                 | 37      | HS-oct-Fe(III) |
| 0.38                 | 0.55     | 1.01    |                 | 41      |                |

|       |      |       |      |    |                |
|-------|------|-------|------|----|----------------|
| 1.11  | 0.32 | 2.75  |      | 14 | HS-oct-Fe(II)  |
| 1.08  | 0.33 | 2.43  |      | 9  |                |
| 77 K  |      |       |      |    |                |
| 0.46  | 0.64 | 0.78  |      | 74 | HS-oct-Fe(III) |
| 1.28  | 0.43 | 2.83  |      | 24 | HS-oct-Fe(II)  |
| 0.48  | 0.5  | -0.22 | 49.5 | 2  | goethite       |
| Crust |      |       |      |    |                |
| 300 K |      |       |      |    |                |
| 0.35  | 0.53 | 0.60  |      | 53 | HS-oct-Fe(III) |
| 0.41  | 0.27 | 1.13  |      | 13 |                |
| 1.12  | 0.27 | 2.85  |      | 15 | HS-oct-Fe(II)  |
| 1.11  | 0.43 | 2.53  |      | 20 |                |
| 77 K  |      |       |      |    |                |
| 0.47  | 0.68 | 0.72  |      | 63 | HS-oct-Fe(III) |
| 1.25  | 0.41 | 2.92  |      | 33 | HS-oct-Fe(II)  |
| 0.46  | 0.5  | -0.22 | 54.0 | 3  | hematite       |
| 0.48  | 0.5  | -0.22 | 49.2 | 2  | goethite       |

I.S. = Isomer shift value relative to that of the  $\alpha$ -Fe at 300 K. ( $\text{mm}\cdot\text{s}^{-1}$ )

F.W.H.M = Full width of line at half of its maximum intensity. ( $\text{mm}\cdot\text{s}^{-1}$ )

Q.S./ $2\varepsilon$  = Quadrupolar splitting

$B_{\text{hf}}$  = Magnetic hyperfine field (T)

#### S4-3 MX80/quartz (Block #25)

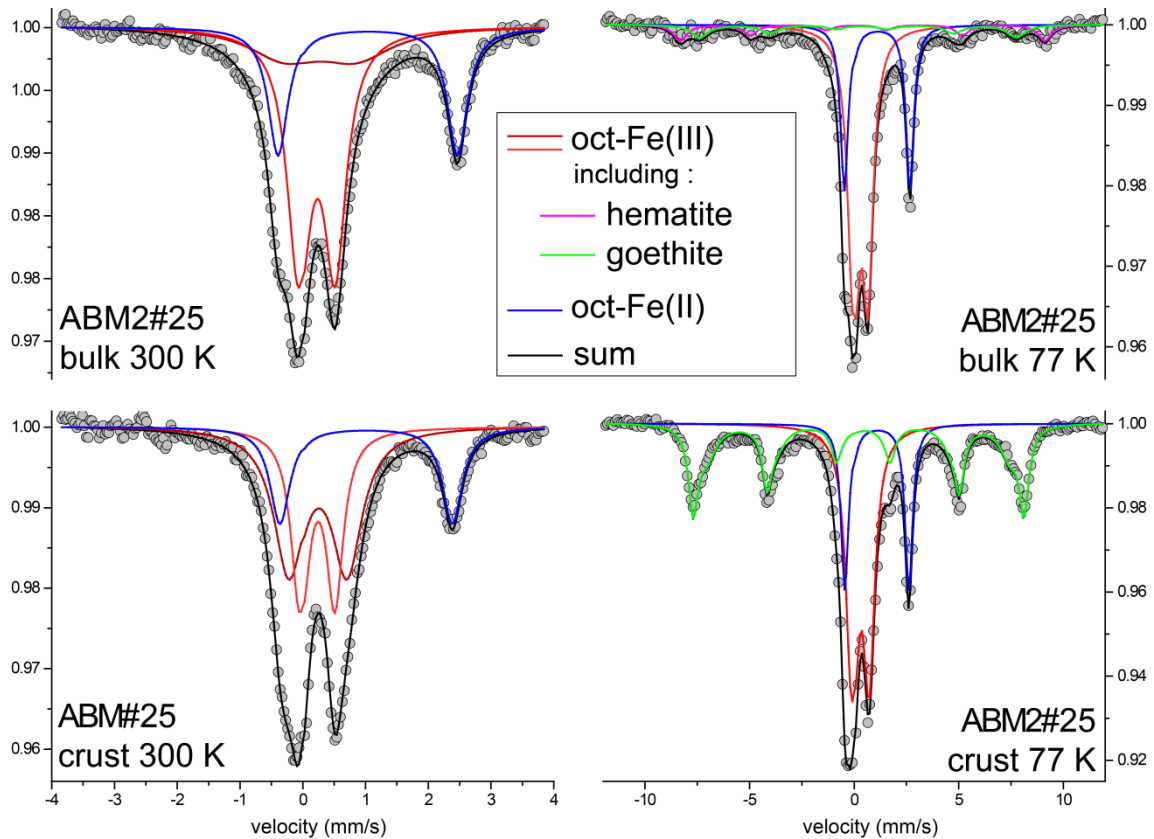

Fig. S4-4 Mössbauer spectra of the bulk and crust samples of block ABM2#25 (hyperfine parameters displayed in Table S4-4).

Table S4-4 Refined values of Mössbauer parameters and doublet structural attributions for the bulk and crust samples collected on block ABM2#25 (MX80+quartz).

| Hyperfine parameters |          |         |                        |         | Attribution    |
|----------------------|----------|---------|------------------------|---------|----------------|
| I.S.                 | F.W.H.M. | Q.S./2ε | <i>B</i> <sub>hf</sub> | Area(%) |                |
| Bulk                 |          |         |                        |         |                |
| 300 K                |          |         |                        |         |                |
| 0.41                 | 1.40     | 1.12    |                        | 22      | HS-oct-Fe(III) |
| 0.35                 | 0.43     | 0.56    |                        | 52      |                |
| 1.16                 | 0.39     | 2.83    |                        | 26      | HS-oct-Fe(II)  |
| 77 K                 |          |         |                        |         |                |
| 0.46                 | 0.61     | 0.62    |                        | 55      | HS-oct-Fe(III) |
| 1.25                 | 0.45     | 3.04    |                        | 27      | HS-oct-Fe(II)  |
| 0.41                 | 0.80     | 0.30    | 53.8                   | 9       | hematite       |
| 0.54                 | 1.04     | -0.18   | 46.7                   | 9       | goethite       |
| Crust                |          |         |                        |         |                |
| 300 K                |          |         |                        |         |                |
| 0.37                 | 0.58     | 0.90    |                        | 47      | HS-oct-Fe(III) |
| 0.35                 | 0.33     | 0.53    |                        | 32      |                |
| 1.14                 | 0.38     | 2.72    |                        | 21      | HS-oct-Fe(II)  |
| 77 K                 |          |         |                        |         |                |
| 0.46                 | 0.65     | 0.75    |                        | 40      | HS-oct-Fe(III) |
| 1.25                 | 0.44     | 2.97    |                        | 19      | HS-oct-Fe(II)  |
| 0.48                 | 0.53     | -0.22   | 48.8                   | 22      | hematite       |
| 0.49                 | 1.16     | -0.26   | 44.8                   | 19      | goethite       |

I.S. = Isomer shift value relative to that of the  $\alpha$ -Fe at 300 K. ( $\text{mm}\cdot\text{s}^{-1}$ )

F.W.H.M = Full width of line at half of its maximum intensity. ( $\text{mm}\cdot\text{s}^{-1}$ )

Q.S./2 $\epsilon$  = Quadrupolar splitting

$B_{\text{hf}}$  = Magnetic hyperfine field (T)

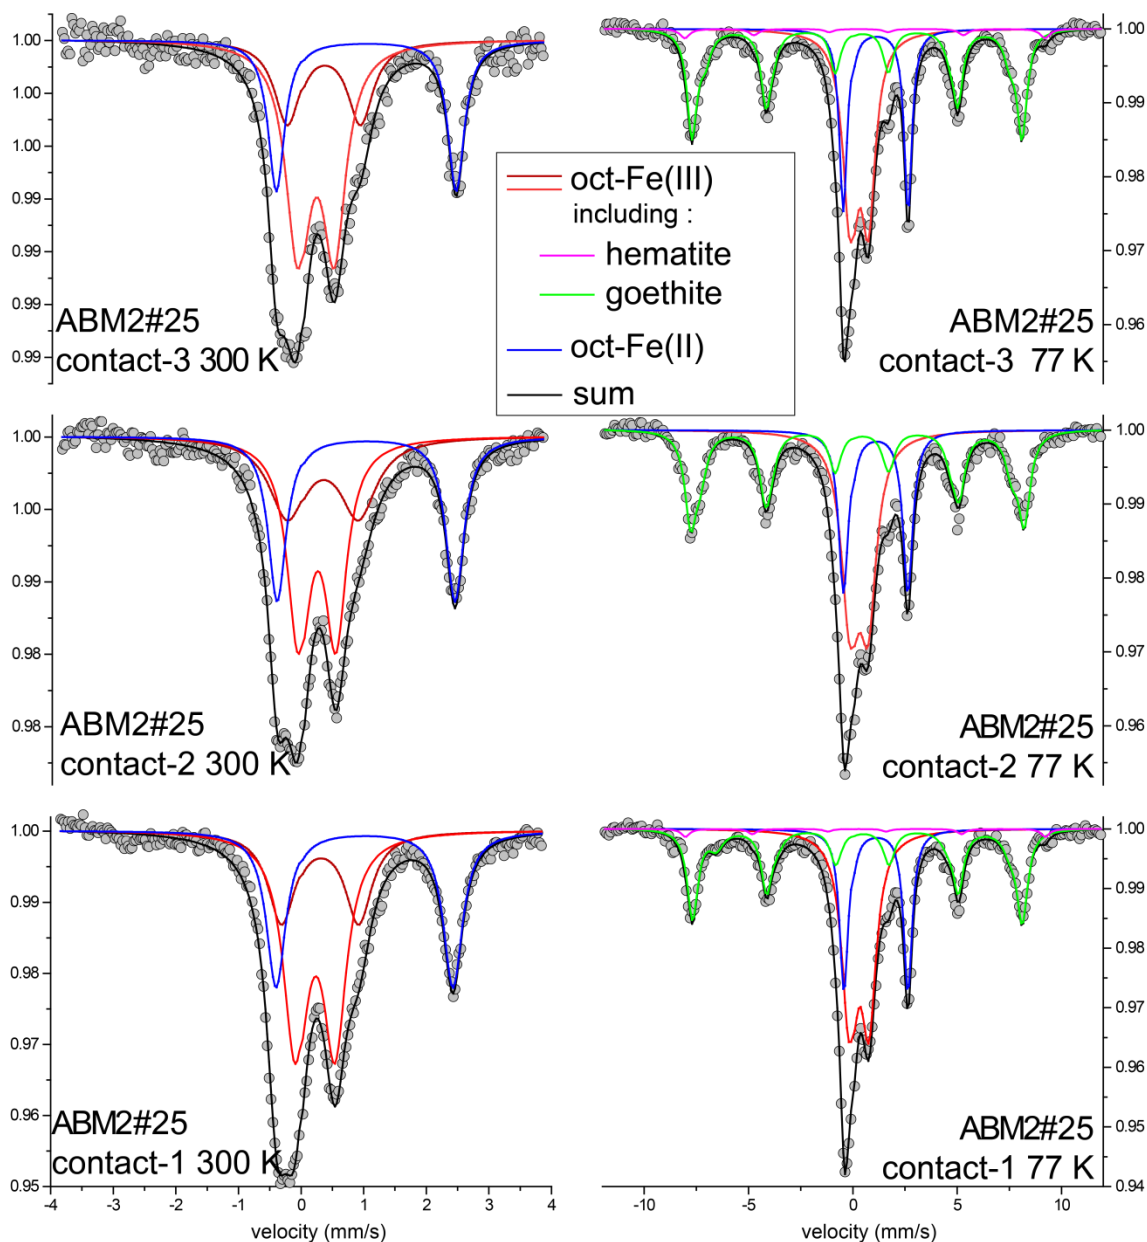

Fig. S4-5 Mössbauer spectra of the crust samples from ABM2#25. The hyperfine parameters are displayed in

Table S4-5.

Table S4-5 Refined values of Mössbauer parameters and doublet structural attributions for the three contact sample collected on block ABM2#25 (MX80+quartz). Parameters indicated in *italic* account for an inconsistent fit (regarding fit at 77K and evolution of parameters). These data are preliminary.

| Hyperfine parameters |          |         |                 |         | Attribution    |
|----------------------|----------|---------|-----------------|---------|----------------|
| I.S.                 | F.W.H.M. | Q.S./2ε | $B_{\text{hf}}$ | Area(%) |                |
| Contact-3            |          |         |                 |         |                |
| 300 K                |          |         |                 |         |                |
| 0.46                 | 0.29     | 1.14    |                 | 22      | HS-oct-Fe(III) |

| Hyperfine parameters |          |         |                 |         | Attribution    |
|----------------------|----------|---------|-----------------|---------|----------------|
| I.S.                 | F.W.H.M. | Q.S./2ε | $B_{\text{hf}}$ | Area(%) |                |
| 0.33                 | 0.45     | 0.56    |                 | 51      | HS-oct-Fe(II)  |
| 1.14                 | 0.32     | 2.84    |                 | 27      |                |
| 77 K                 |          |         |                 |         |                |
| 0.46                 | 0.81     | 0.80    |                 | 37      | HS-oct-Fe(III) |
| 1.26                 | 0.45     | 3.01    |                 | 21      | HS-oct-Fe(II)  |
| 0.59                 | 0.56     | 0.30    | 53.3            | 3       | hematite       |
| 0.48                 | 0.57     | -0.23   | 48.8            | 30      | goethite       |
| 0.48                 | 0.69     | -0.19   | 45.1            | 9       | goethite       |
| Contact-2            |          |         |                 |         |                |
| 300 K                |          |         |                 |         |                |
| 0.45                 | 0.70     | 1.11    |                 | 28      | HS-oct-Fe(III) |
| 0.35                 | 0.42     | 0.57    |                 | 42      |                |
| 1.14                 | 0.35     | 2.81    |                 | 30      | HS-oct-Fe(II)  |
| 77 K                 |          |         |                 |         |                |
| 0.45                 | 0.96     | 0.79    |                 | 38      | HS-oct-Fe(III) |
| 1.26                 | 0.58     | 2.99    |                 | 22      | HS-oct-Fe(II)  |
| 0.5                  | 0.66     | -0.23   | 49.4            | 28      | hematite       |
| 0.44                 | 0.73     | -0.23   | 46.1            | 12      | goethite       |
| Contact-1            |          |         |                 |         |                |
| 300 K                |          |         |                 |         |                |
| 0.35                 | 0.63     | 0.61    |                 | 37      | HS-oct-Fe(III) |
| 0.35                 | 0.63     | 1.25    |                 | 14      |                |
| 1.14                 | 0.52     | 2.71    |                 | 23      | HS-oct-Fe(II)  |
| 0.27                 | 1.11     | -0.31   | 31.9            | 16      | goethite       |
| 0.27                 | 1.11     | -0.31   | 22.8            | 10      | goethite       |
| 77 K                 |          |         |                 |         |                |
| 0.46                 | 0.86     | 0.86    |                 | 40      | HS-oct-Fe(III) |
| 1.27                 | 0.50     | 2.97    |                 | 21      | HS-oct-Fe(II)  |
| 0.58                 | 0.50     | 0.40    | 53.3            | 2       | hematite       |
| 0.50                 | 0.62     | -0.24   | 48.8            | 29      | goethite       |
| 0.50                 | 0.83     | -0.24   | 43.4            | 7       | goethite       |

I.S. = Isomer shift value relative to that of the  $\alpha$ -Fe at 300 K. ( $\text{mm}\cdot\text{s}^{-1}$ )

F.W.H.M = Full width of line at half of its maximum intensity. ( $\text{mm}\cdot\text{s}^{-1}$ )

Q.S./2ε = Quadrupolar splitting

$B_{\text{hf}}$  = Magnetic hyperfine field (T)

#### S4-4 Deponit (Block #26)

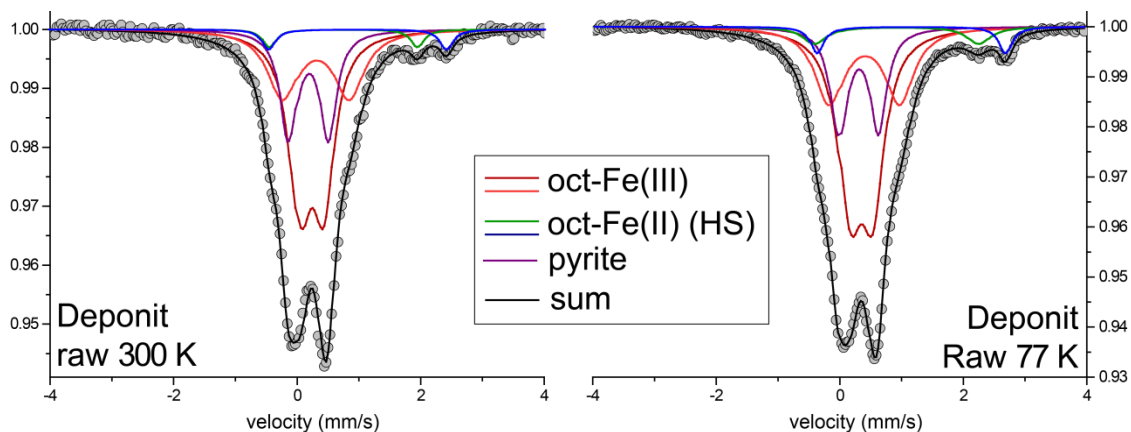

Fig. S4-6 Room temperature and 77 K Mössbauer spectra of the raw Deponit bentonite used in ABM2 experiment.



Table S4-6 Refined values of Mössbauer parameters and doublet structural attributions for the raw Deponit sample.

| Hyperfine parameters |          |      |         | Attribution    |
|----------------------|----------|------|---------|----------------|
| I.S.                 | F.W.H.M. | Q.S. | Area(%) |                |
| 300 K                |          |      |         |                |
| 0.35                 | 0.42     | 0.37 | 45      | HS-oct-Fe(III) |
| 0.42                 | 0.59     | 1.05 | 26      | HS-oct-Fe(III) |
| 0.30                 | 0.32     | 0.62 | 22      | Pyrite         |
| 0.87                 | 0.27     | 2.36 | 3       | HS-oct-Fe(II)  |
| 1.10                 | 0.27     | 2.84 | 4       | HS-oct-Fe(II)  |
| 77 K                 |          |      |         |                |
| 0.46                 | 0.45     | 0.36 | 45      | HS-oct-Fe(III) |
| 0.52                 | 0.56     | 1.11 | 26      | HS-oct-Fe(III) |
| 0.42                 | 0.32     | 0.62 | 20      | Pyrite         |
| 1.04                 | 0.48     | 2.63 | 5       | HS-oct-Fe(II)  |
| 1.28                 | 0.27     | 3.02 | 4       | HS-oct-Fe(II)  |

I.S. = Isomer shift value relative to that of the  $\alpha$ -Fe at 300 K.

F.W.H.M = Full width of line at half of its maximum intensity.

Q.S. = Quadrupolar splitting

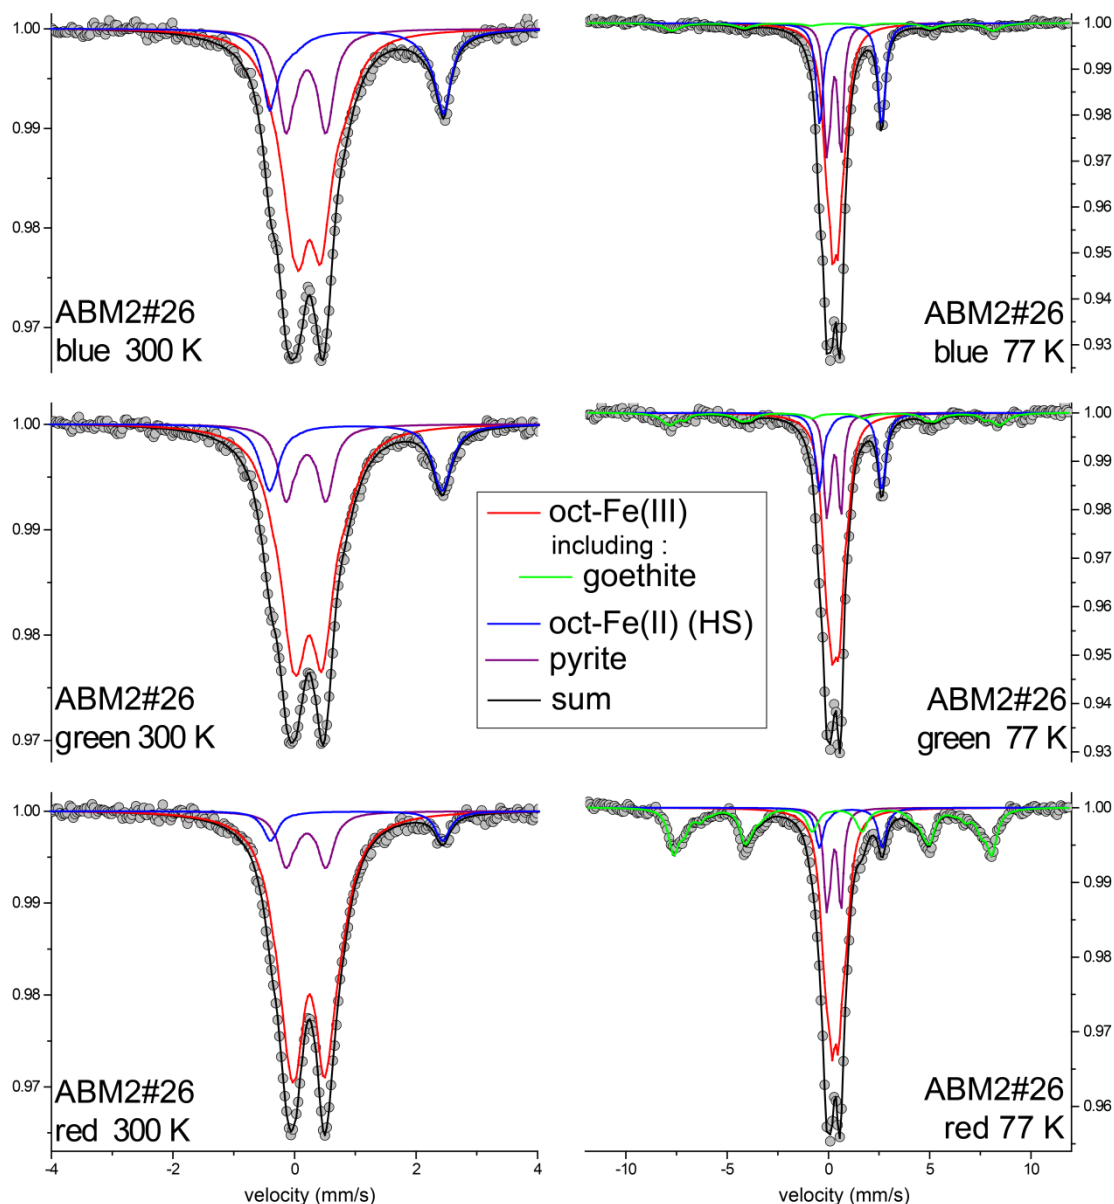

Fig. S4-7 Room temperature and 77 K Mössbauer spectra of a series of 3 samples from block ABM2#26. The hyperfine parameters are displayed in Table S4-7.

Table S4-7 Refined values of Mössbauer parameters and doublet structural attributions for the ample collected on block ABM2#26 (Deponit)

| Hyperfine parameters |          |         |                        |         | Attribution    |
|----------------------|----------|---------|------------------------|---------|----------------|
| I.S.                 | F.W.H.M. | Q.S./2ε | <i>B</i> <sub>hf</sub> | Area(%) |                |
| Red                  |          |         |                        |         |                |
| 300 K                |          |         |                        |         |                |
| 0.35                 | 0.38     | 0.48    |                        | 51      | HS-oct-Fe(III) |
| 0.36                 | 0.55     | 0.90    |                        | 31      |                |
| 0.31                 | 0.32     | 0.62    |                        | 12      | pyrite         |
| 1.14                 | 0.30     | 2.80    |                        | 6       | HS-oct-Fe(II)  |
| 77 K                 |          |         |                        |         |                |
| 0.45                 | 0.41     | 0.31    |                        | 22      | HS-oct-Fe(III) |
| 0.48                 | 0.62     | 0.93    |                        | 24      | HS-oct-Fe(III) |
| 0.42                 | 0.32     | 0.62    |                        | 12      | pyrite         |

| Hyperfine parameters |          |         |                 |         | Attribution    |
|----------------------|----------|---------|-----------------|---------|----------------|
| I.S.                 | F.W.H.M. | Q.S./2ε | $B_{\text{hf}}$ | Area(%) |                |
| 1.26                 | 0.50     | 3.00    |                 | 8       | HS-oct-Fe(II)  |
| <0.48>               |          | <-.22>  | <46.1>          | 35      | goethite       |
| 0.48                 | 0.60     | -0.22   | 48.5            | (20)    | (goethite)     |
| 0.48                 | 0.60     | -0.22   | 45.3            | (9)     | (goethite)     |
| 0.48                 | 0.60     | -0.22   | 40.5            | (5)     | (goethite)     |
| 0.48                 | 0.60     | -0.22   | 37              | (2)     | (goethite)     |
| <b>Green</b>         |          |         |                 |         |                |
| <b>300 K</b>         |          |         |                 |         |                |
| 0.34                 | 0.45     | 0.43    | 55%             | 37      | HS-oct-Fe(III) |
| 0.39                 | 0.56     | 1.11    | 14%             | 41      |                |
| 0.31                 | 0.32     | 0.62    | 15%             | 14      |                |
| 1.13                 | 0.37     | 2.81    | 16%             | 9       | HS-oct-Fe(II)  |
| <b>77 K</b>          |          |         |                 |         |                |
| 0.46                 | 0.64     | 0.78    |                 | 74      | HS-oct-Fe(III) |
| 1.28                 | 0.43     | 2.83    |                 | 24      | HS-oct-Fe(II)  |
| 0.48                 | 0.50     | -0.22   | 49.5            | 2       | goethite       |
| <b>Blue</b>          |          |         |                 |         |                |
| <b>300 K</b>         |          |         |                 |         |                |
| 0.35                 | 0.53     | 0.60    |                 | 53      | HS-oct-Fe(III) |
| 0.41                 | 0.27     | 1.13    |                 | 13      |                |
| 1.12                 | 0.27     | 2.85    |                 | 15      |                |
| 1.11                 | 0.43     | 2.53    |                 | 20      | HS-oct-Fe(II)  |
| <b>77 K</b>          |          |         |                 |         |                |
| 0.47                 | 0.68     | 0.72    |                 | 63      | HS-oct-Fe(III) |
| 1.25                 | 0.41     | 2.92    |                 | 33      | HS-oct-Fe(III) |
| 0.46                 | 0.50     | -0.22   | 54.0            | 3       | hematite       |
| 0.48                 | 0.50     | -0.22   | 49.2            | 2       | goethite       |

I.S. = Isomer shift value relative to that of the  $\alpha$ -Fe at 300 K. ( $\text{mm}\cdot\text{s}^{-1}$ )

F.W.H.M = Full width of line at half of its maximum intensity. ( $\text{mm}\cdot\text{s}^{-1}$ )

Q.S./2ε = Quadrupolar splitting

$B_{\text{hf}}$  = Magnetic hyperfine field (T)

## S4-5 Fe distribution inferred from Mössbauer data

Table S4-8 Fe distribution inferred from Mössbauer data

| block # | material    | sample type | Distance interface | Absolute content           |                             |                              |                          |                    |                     |                    |                     |  |  |
|---------|-------------|-------------|--------------------|----------------------------|-----------------------------|------------------------------|--------------------------|--------------------|---------------------|--------------------|---------------------|--|--|
|         |             |             |                    | total Fe <sup>a</sup>      | (species distribution)      |                              |                          |                    |                     |                    |                     |  |  |
|         |             |             |                    |                            | HS-para-Fe(II) <sup>b</sup> | HS-para-Fe(III) <sup>c</sup> | mag-Fe(III) <sup>d</sup> |                    |                     |                    | pyrite              |  |  |
|         |             |             |                    |                            |                             |                              | total mag <sup>e</sup>   | goethite           |                     | hematite           |                     |  |  |
|         |             |             |                    |                            |                             |                              |                          | large <sup>f</sup> | medium <sup>g</sup> | large <sup>f</sup> | medium <sup>g</sup> |  |  |
|         |             |             | (mm)               | (mmolFe·kg <sup>-1</sup> ) |                             |                              |                          |                    |                     |                    |                     |  |  |
| #08     | MX80        | raw         | raw                | 490                        | 88                          | 402                          |                          |                    |                     |                    |                     |  |  |
|         |             | crust       | <0.3               | 610                        | 77                          | 533                          |                          |                    |                     |                    |                     |  |  |
|         |             | contact     | 0.3-5              | 485                        | 127                         | 357                          |                          |                    |                     |                    |                     |  |  |
|         | bulk        |             | >45                |                            |                             |                              |                          |                    |                     |                    |                     |  |  |
|         |             |             |                    |                            |                             |                              |                          |                    |                     |                    |                     |  |  |
|         |             |             |                    |                            |                             |                              |                          |                    |                     |                    |                     |  |  |
| #11     | Ibecoseal   | raw         | raw                | 476                        | 148                         | 328                          |                          |                    | n.d.                |                    | n.d.                |  |  |
|         |             | crust       | <0.3               | 2128                       | 500                         | 1581                         | 47                       |                    | 47                  |                    |                     |  |  |
|         |             | contact     | 0.3-5              | 856                        | 278                         | 542                          | 36                       |                    | 14                  |                    | 22                  |  |  |
|         | bulk        |             | >45                |                            |                             |                              |                          |                    |                     |                    |                     |  |  |
|         |             |             |                    |                            |                             |                              |                          |                    |                     |                    |                     |  |  |
|         |             |             |                    |                            |                             |                              |                          |                    |                     |                    |                     |  |  |
| #12     | Ikosorb     | raw         | raw                | 321                        |                             |                              |                          |                    |                     |                    |                     |  |  |
|         |             | crust       | <0.3               | 1420                       | 128                         | 1150                         | 142                      |                    | 114                 |                    | 28                  |  |  |
|         |             | contact     | 0.3-5              | 436                        | 44                          | 306                          | 87                       |                    | 61                  |                    | 26                  |  |  |
|         | heart       |             | 15-25              |                            |                             |                              |                          |                    |                     |                    |                     |  |  |
|         |             |             |                    |                            |                             |                              |                          |                    |                     |                    |                     |  |  |
|         |             |             |                    |                            |                             |                              |                          |                    |                     |                    |                     |  |  |
| #13     | Kunigel     | raw         | raw                | 232                        |                             |                              |                          |                    |                     |                    |                     |  |  |
|         |             | crust       |                    | 290                        |                             |                              |                          |                    |                     |                    |                     |  |  |
|         |             |             |                    |                            |                             |                              |                          |                    |                     |                    |                     |  |  |
| #25     | MX80+30%qtz | raw         | raw                | 343                        | 62                          | 281                          |                          |                    |                     |                    |                     |  |  |
|         |             | crust       | <0.3               | 1989                       | 378                         | 796                          | 816                      |                    | 816                 |                    |                     |  |  |
|         |             | contact 1   | 1.5                | 1658                       | 348                         | 663                          | 630                      |                    | 597                 |                    | 33                  |  |  |
|         | contact 2   |             | 3                  |                            |                             |                              |                          |                    |                     |                    |                     |  |  |
|         |             |             |                    |                            |                             |                              |                          |                    |                     |                    |                     |  |  |
|         |             |             |                    |                            |                             |                              |                          |                    |                     |                    |                     |  |  |
| #26     | Deponit CAN | contact 3   | 4.5                | 552                        | 116                         | 204                          | 232                      |                    | 215                 |                    | 17                  |  |  |
|         |             | bulk        | 45                 | 378                        | 102                         | 208                          | 68                       |                    | 34                  |                    | 34                  |  |  |
|         |             |             |                    |                            |                             |                              |                          |                    |                     |                    |                     |  |  |
| #27     | MX80        | raw         | raw                | 490                        | 88                          | 402                          |                          |                    |                     |                    |                     |  |  |
|         |             | crust       | <0.3               | 645                        | 97                          | 548                          |                          |                    |                     |                    |                     |  |  |
|         |             | salt        | 7                  | 576                        | 63                          | 294                          | 219                      |                    | 219                 |                    |                     |  |  |
|         | bulk        |             | 25                 |                            |                             |                              |                          |                    |                     |                    |                     |  |  |
|         |             |             |                    |                            |                             |                              |                          |                    |                     |                    |                     |  |  |
|         |             |             |                    |                            |                             |                              |                          |                    |                     |                    |                     |  |  |

### Table S4-9 (cont.)

<sup>a</sup> Determined by XRF (raw materials) and SEM/EDX by EDX contact/bulk samples

<sup>b</sup> Paramagnetic Fe(II) (~total Fe(II) content)

<sup>c</sup> Paramagnetic Fe(III) (Paramagnetic Fe(III) (= total Fe – paramagnetic Fe(II) – magnetically ordered Fe(III))

<sup>d</sup> Magnetically ordered Fe(III)

<sup>e</sup> Fe(III) in species magnetically ordered at 77 K (i.e. includes medium- and large-sized species)

<sup>f</sup> Fe(III) in species magnetically ordered at 300 K

<sup>g</sup> Difference between contents at 77 K and at 300 K
