# Supplementary material for: Interaction of Corroding Iron with Eight Bentonites in the Alternative Buffer Materials Field Experiment (ABM2)
Source: MDPI journal article supplement (doi:10.3390/min11080907), 2021-08-22
Supplement: s1 [file s1]

## **SUPPLEMENTARY MATERIAL**

related to

### **Interaction of corroding iron with seven bentonites in the alternative buffer materials field experiment (ABM2)**

Paul Wersin, Jebril Hadi\*, Andreas Jenni, Daniel Svensson, Jean-Marc Grenèche, Patrik Sellin, Olivier X. Leupin

## **S3 XRD and XRF data**

### **Contents**

|                                              |   |
|----------------------------------------------|---|
| S3-1 XRD data of Ibecoseal (Block #11) ..... | 1 |
| S3-2 XRD data of Ikosorb (Block #12) .....   | 2 |
| S3-3 XRD data of MX-80/qz (Block #25) .....  | 4 |
| S3-4 XRD data of Deponit (Block #26) .....   | 5 |
| S3-5 XRF data .....                          | 7 |

Counts

Position [°2Theta] (Copper (Cu))

Ibicoseal raw (4x 1 h, averaged)  
Ibicoseal raw (10 h, re-crushed, disoriented)

cal: calcite (96-901-6707)  
cbl: cristobalite (96-901-1579)  
dol: dolomite (96-900-4929)  
gyp: gypsum (96-9013165)  
hem: hematite (96-900-9783)  
ill: illite (96-901-3724)  
mmt: monmorillonite  
qtz: quartz (96-101-1098)  
pyr: pyrite (00-041-1340)

fel: feldspar including  
-albite (96-900-5080)  
-anorthite (96-900-6347)  
-microcline (96-900-5038)  
-orthoclase (96-900-6347)  
-sanidine (96-900-5266)

Counts

different mica ?

Na-Ca exchange

anh

fel

cbl

cal

qtz

cal

cal

anh: anhydrite (96-500-0041)

Position [°2Theta] (Copper (Cu))

Legend:

- Ibecoseal raw (dome)
- ABM2#11bulk (dome)
- ABM2#11contact (dome)
- ABM2#11crust (dome)

S2-1

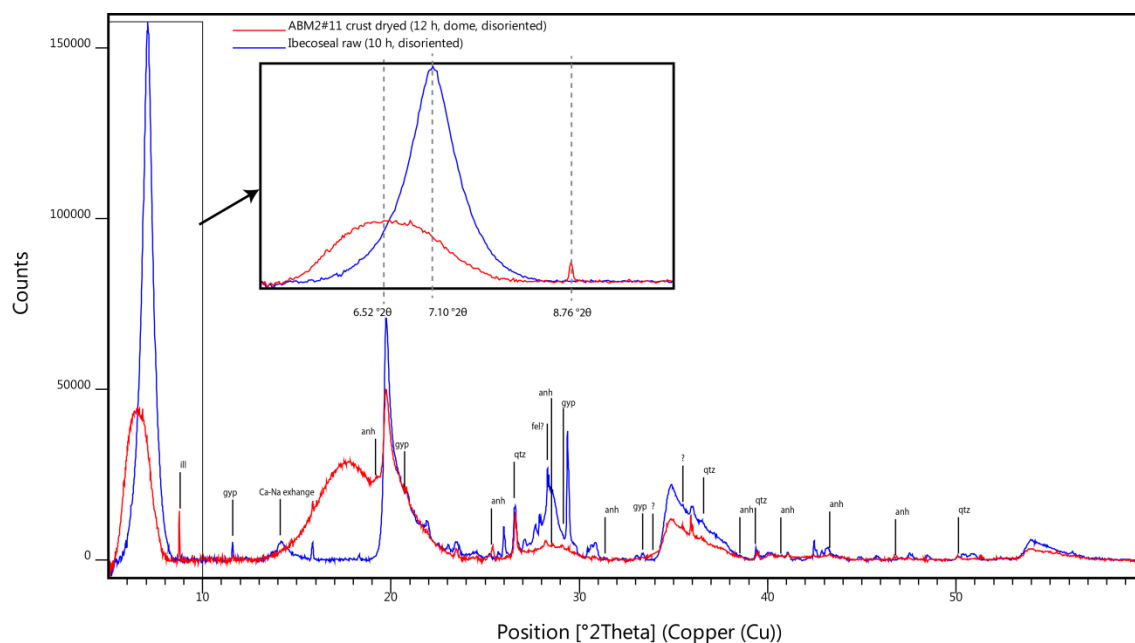

Fig. S3-3 Diffractograms (slow scan rate) of (red) the domed crust sample from block ABM2#11 and (blue) the undomed raw Ibeseal.

### S3-2 XRD data of Ikosorb (Block #12)

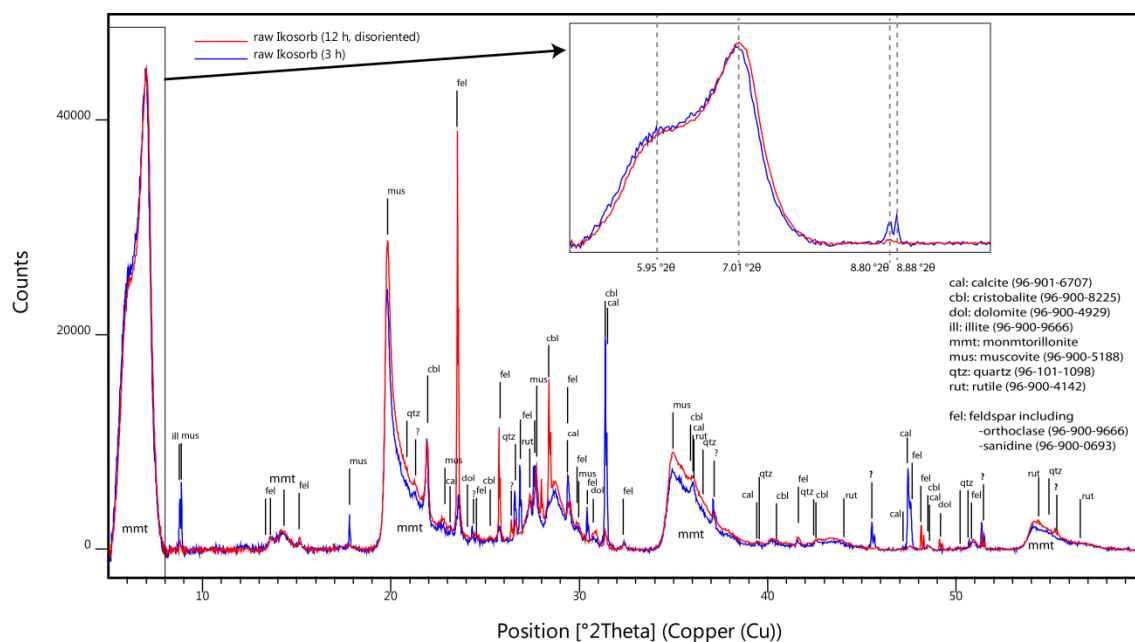

Fig. S3-4 Diffractograms of the raw Ikosorb bentonites (two different aliquots with scan rates).

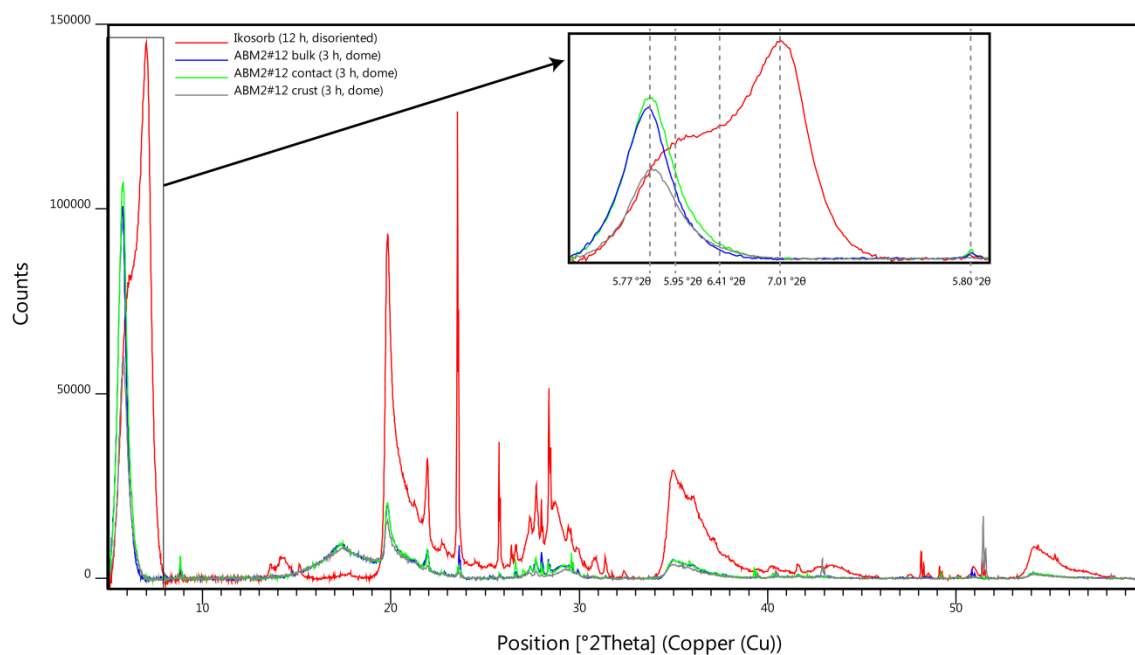

Fig. S3-5 Diffractograms of the profile samples (bulk/contact/crust) from block ABM2#12 and of the undomed raw material.

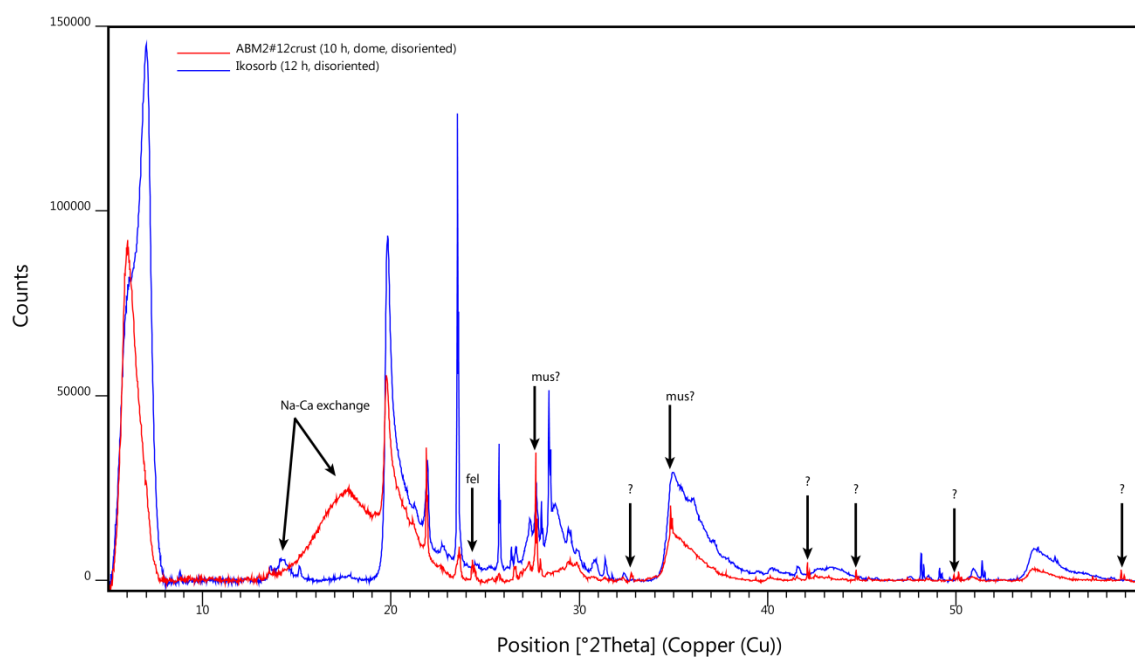

Fig. S3-6 Diffractograms of the crust (disorientated, slow scan rate) and of the undomed raw material.

### S3-3 XRD data of MX-80/qz (Block #25)

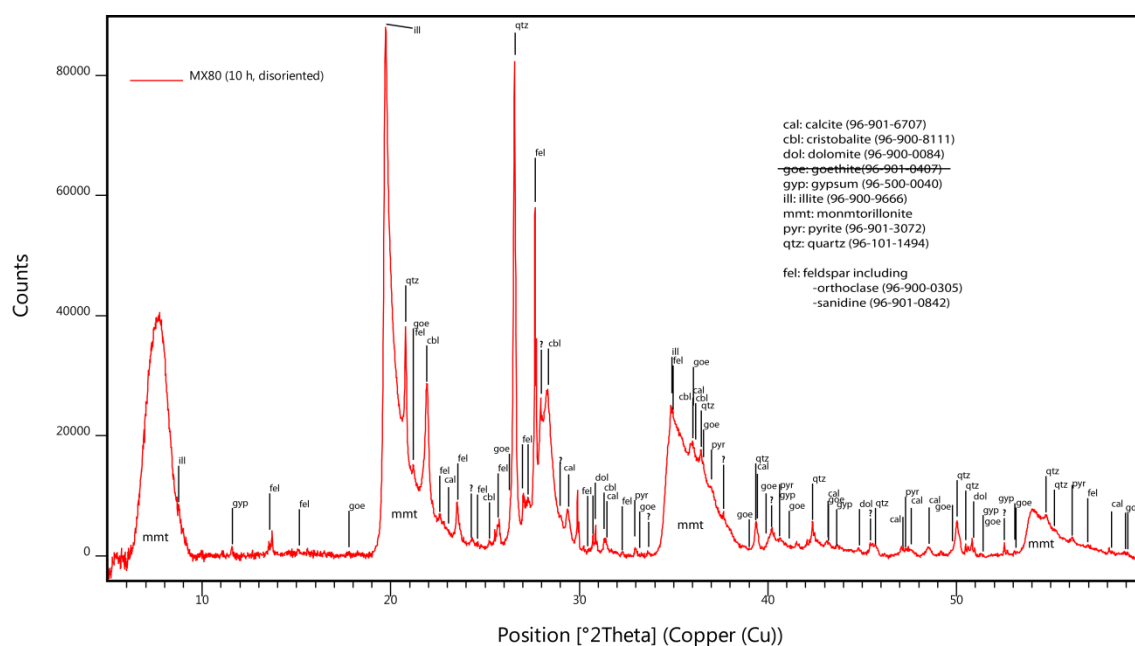

Fig. S3-7 Diffractograms of the raw MX80 bentonites.

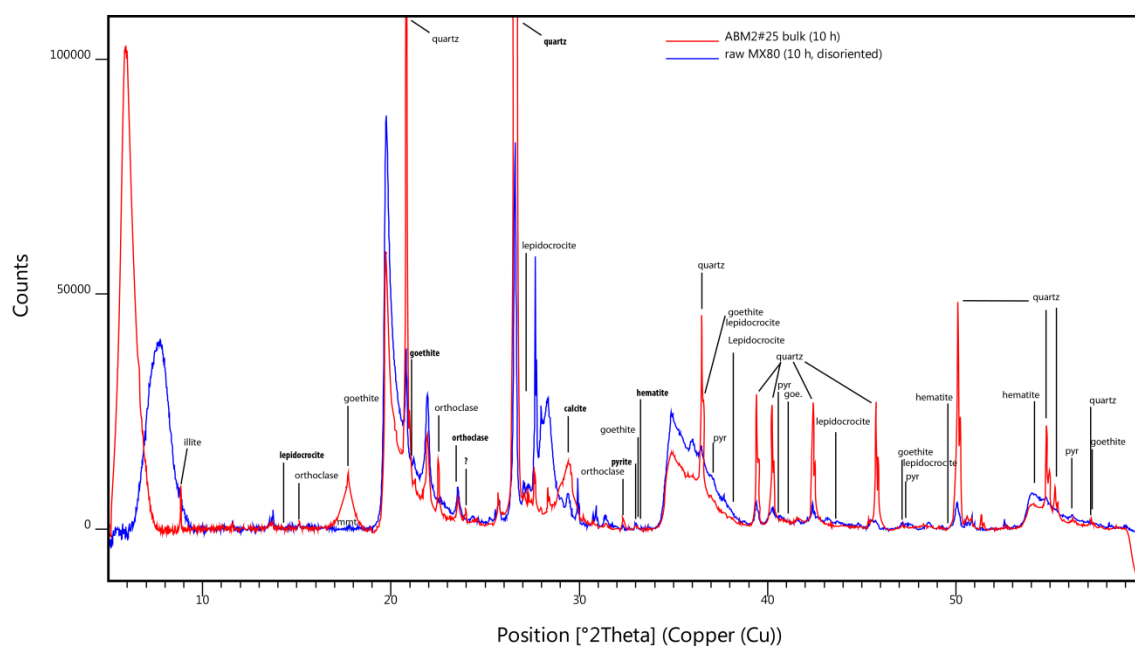

Fig. S3-8 Diffractograms of bulk sample from block ABM2#25 (MX80+quartz) and of the raw MX80 material (both undomed). The positions of some accessory phase of original material (quartz, orthoclase and calcite), as well as common Fe bearing oxides expected to be found in the raw material or in the corrosion product are indicated (the main reflections indicated in bold)

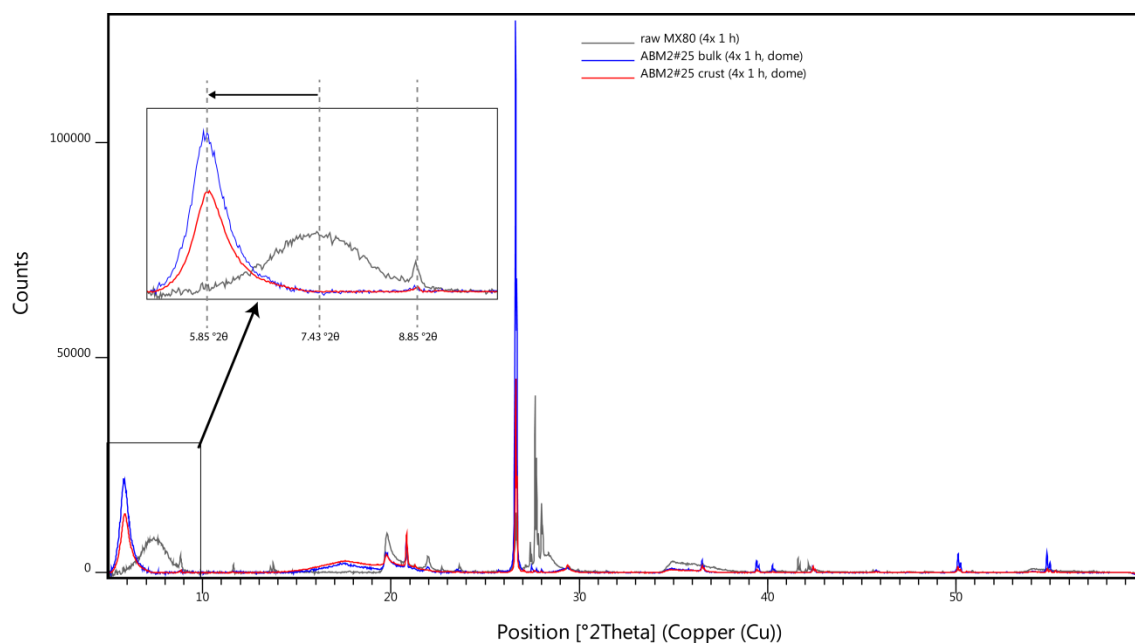

Fig. S3-9 Diffractograms of profile samples (bulk/crust) from block ABM2#25 and of the undomed raw material.

### S3-4 XRD data of Deponit (Block #26)

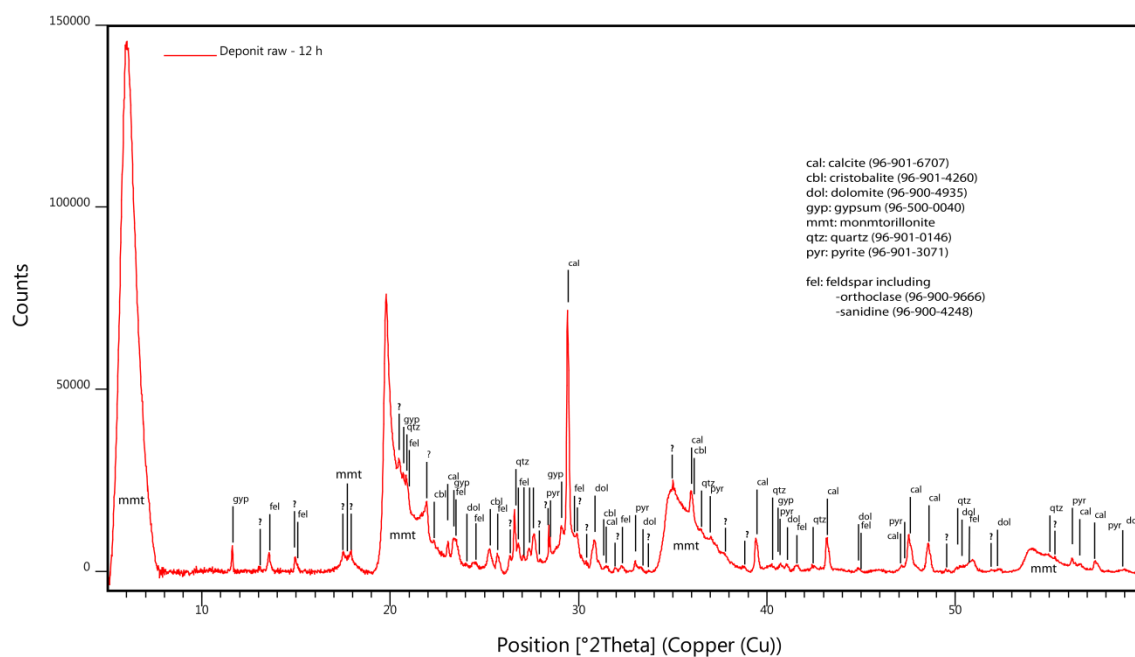

Fig. S3-10 Diffractograms of the raw Deponit bentonites (the fit is an arbitrary sum of pseudo Voigtian curves).

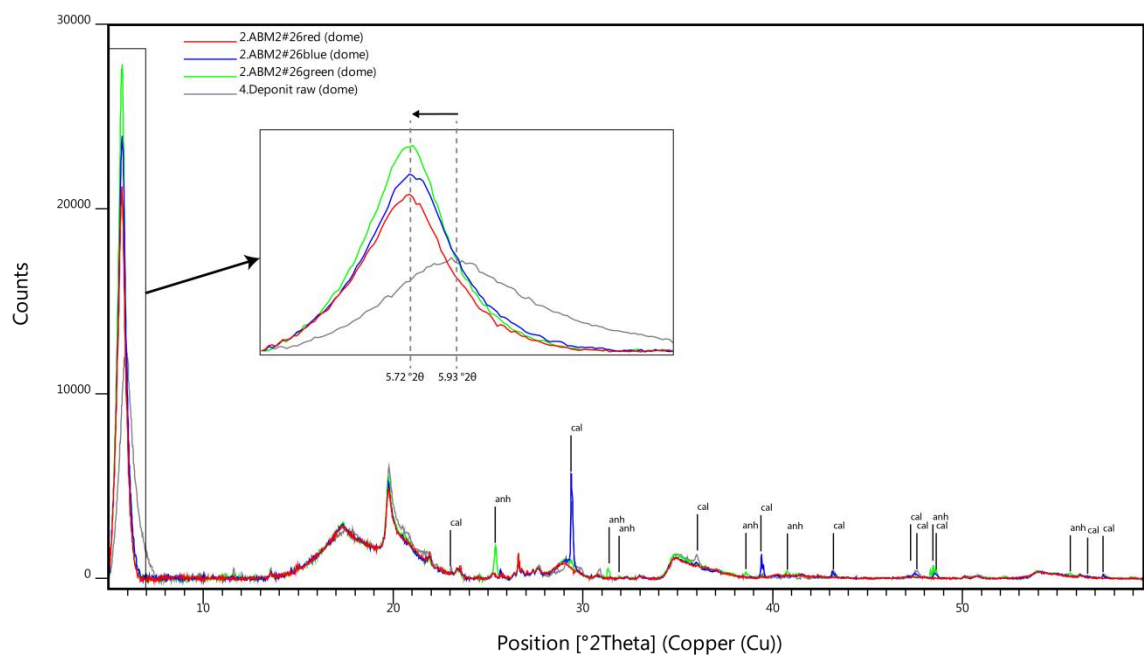

Fig. S3-11 Diffractograms of the red/green/blue samples from block ABM2#26 and of the raw Deponit bentonites (all domed).

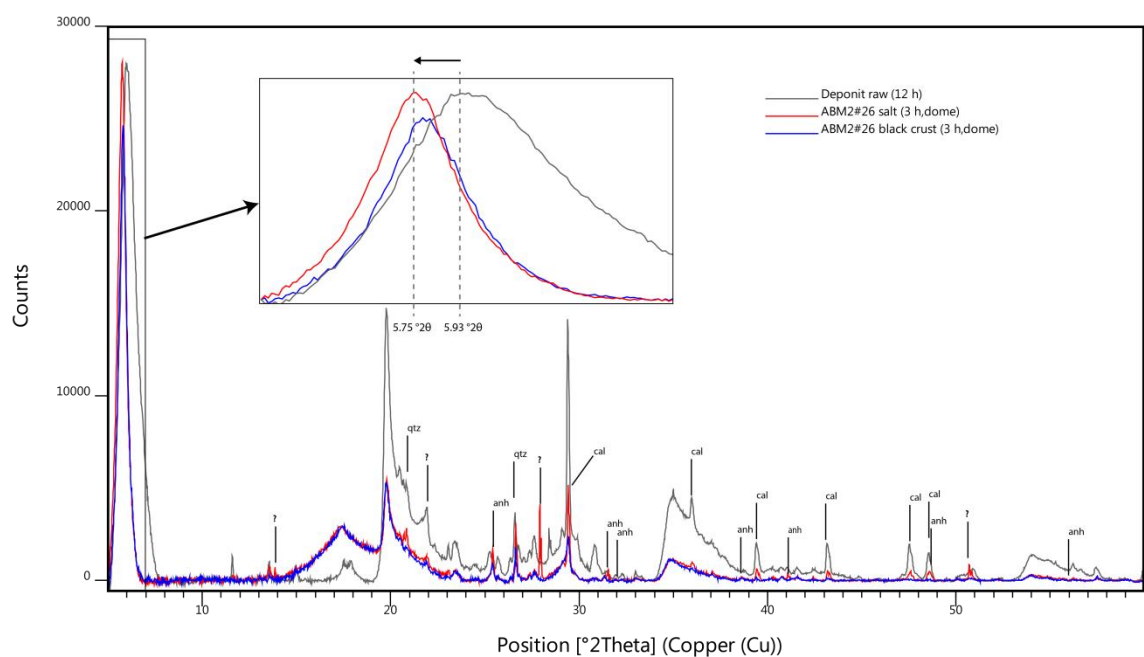

Fig. S3-12 Diffractograms two domed profile samples (black crust and salt) from block ABM2#36 and of the undomed raw Deponit bentonites.

## S3-5 XRF data

Table S3-1 XRF data

| Material                        | MX80   | Ibecoseal | Ibecoseal | Ikosorb | Ikosorb | Ikosorb | Kunigel | MX80/qz | MX80/qz | MX80/qz | MX80/qz | Deponit | Deponit | Deponit | Deponit | Deponit | MX80    | MX80   |
|---------------------------------|--------|-----------|-----------|---------|---------|---------|---------|---------|---------|---------|---------|---------|---------|---------|---------|---------|---------|--------|
| Sample ID                       | 08B    | 11B       | 11Co      | 12B     | 12Co    | 12H     | 13C     | 25B     | 25Cr    | 25Co2   | 25Co3   | 26Blue  | 26Green | 26Red   | 26RC    | 26S     | 27Co    | 27H    |
| Type                            | bulk   | bulk      | contact   | bulk    | contact | heart   | contact | bulk    | crust   | contact | contact | blue    | green   | red     | crust   | salt    | contact | heart  |
| %H <sub>2</sub> O               | 10.25  | 15.32     | 16.36     | 14.4    | 12.47   | 12.81   | 9.3     | 9.22    | 7.93    | 9.37    | 9.19    | 13.98   | 14.22   | 14.62   | 13.29   | 13.95   | 14.05   | 14.28  |
| LOI                             | 7.54   | 10.62     | 8.96      | 8.74    | 8.34    | 8.26    | 6.58    | 5.78    | 8.54    | 5.78    | 5.77    | 10.53   | 9.81    | 9.56    | 9.33    | 11.01   | 8.25    | 7.89   |
| S                               | 101.02 | 100.26    | 100.01    | 100.02  | 99.41   | 99.87   | 100.02  | 100.71  | 100.19  | 100.06  | 100.07  | 99.21   | 99.03   | 100.14  | 101.02  | 100.26  | 100.01  | 100.02 |
| majors elements (in oxide wt.%) |        |           |           |         |         |         |         |         |         |         |         |         |         |         |         |         |         |        |
| SiO <sub>2</sub>                | 67.65  | 62.32     | 61.68     | 62.72   | 62.18   | 62.69   | 75.85   | 77.09   | 64.45   | 73.91   | 73.94   | 60.8    | 60.82   | 60.53   | 60.67   | 60.41   | 65.63   | 66.64  |
| TiO <sub>2</sub>                | 0.17   | 0.47      | 0.47      | 0.26    | 0.25    | 0.27    | 0.16    | 0.17    | 0.14    | 0.15    | 0.16    | 0.85    | 0.86    | 0.85    | 0.85    | 0.84    | 0.16    | 0.17   |
| Al <sub>2</sub> O <sub>3</sub>  | 21.39  | 19.92     | 19.77     | 25.16   | 24.97   | 25.25   | 14.48   | 14.77   | 11.82   | 14.21   | 14.6    | 19.46   | 19.33   | 19.31   | 19.37   | 19.4    | 20.44   | 20.88  |
| Fe <sub>2</sub> O <sub>3</sub>  | 4.38   | 4.59      | 7.61      | 2.77    | 4.14    | 3.39    | 2.44    | 3.37    | 11.83   | 5.18    | 4.86    | 6.81    | 6.25    | 11.07   | 7.2     | 5.63    | 5.57    | 4.7    |
| MnO                             | 0.01   | 0.13      | 0.06      | 0.02    | 0.02    | 0.01    | 0.06    | 0.02    | 0.09    | 0.05    | 0.04    | 0.08    | 0.14    | 0.04    | 0.14    | 0.08    | 0.03    | 0.01   |
| MgO                             | 2.4    | 4.09      | 4.72      | 1.98    | 2.05    | 2.02    | 2.42    | 1.59    | 5.45    | 2.57    | 2.2     | 2.83    | 4.39    | 2.71    | 4.7     | 2.9     | 2.56    | 2.27   |
| CaO                             | 3.16   | 6.22      | 3.5       | 4.02    | 3.16    | 3.52    | 3.33    | 2.09    | 5.16    | 2.51    | 2.53    | 6.32    | 5.25    | 3.64    | 4.52    | 7.73    | 3.7     | 2.92   |
| Na <sub>2</sub> O               | 1.14   | 0.86      | 0.83      | 1.5     | 1.2     | 1.31    | 0.84    | 0.75    | 0.62    | 0.7     | 0.89    | 0.75    | 0.7     | 0.72    | 0.75    | 0.78    | 0.86    | 0.9    |
| TiO <sub>2</sub>                | 0.54   | 1.31      | 1.14      | 1.21    | 1.11    | 1.09    | 0.22    | 0.74    | 0.49    | 0.65    | 0.7     | 0.95    | 0.93    | 0.91    | 0.96    | 0.95    | 0.5     | 0.52   |
| P <sub>2</sub> O <sub>5</sub>   | 0.05   | 0.12      | 0.12      | 0.05    | 0.05    | 0.05    | 0.04    | 0.04    | 0.03    | 0.04    | 0.04    | 0.16    | 0.16    | 0.16    | 0.16    | 0.16    | 0.05    | 0.05   |
| MnO                             | 67.65  | 62.32     | 61.68     | 62.72   | 62.18   | 62.69   | 75.85   | 77.09   | 64.45   | 73.91   | 73.94   | 60.8    | 60.82   | 60.53   | 60.67   | 60.41   | 65.63   | 66.64  |
| Trace elements (in ppm)         |        |           |           |         |         |         |         |         |         |         |         |         |         |         |         |         |         |        |
| Ba                              | 423    | 423       | 1402      | 277     | 2487    | 1920    | 1937    | 1054    | 239     | 189     | 231     | 325     | 1013    | 917     | 993     | 532     | 1074    | 353    |
| Cr                              | 7      | 7         | 17        | 20      | 7       | 4<      | 10      | 8       | 4<      | 29      | 12      | 11      | 30      | 36      | 34      | 34      | 35      | 10     |
| Cu                              | 9      | 9         | 13        | 12      | -0<     | -1<     | -1<     | 1<      | 2<      | 25      | 1<      | 3       | 27      | 29      | 27      | 27      | 28      | 1<     |
| Nb                              | 30     | 30        | 14        | 12      | 23      | 24      | 23      | 10      | 23      | 18      | 21      | 21      | 11      | 11      | 11      | 9       | 11      | 29     |
| Ni                              | 11     | 11        | 9         | 11      | 5       | 4       | 7       | 7       | 9       | 25      | 9       | 9       | 15      | 17      | 16      | 14      | 15      | 7      |
| Pb                              | 39     | 39        | 31        | 23      | 7<      | 7<      | 7<      | 22      | 25      | 14      | 4<      | 4<      | 30      | 49      | 23      | 15      | 25      | 5<     |
| Rb                              | 5      | 5         | 44        | 39      | 31      | 31      | 26      | 7       | 17      | 12      | 15      | 17      | 63      | 64      | 64      | 69      | 64      | 5      |
| Sr                              | 397    | 397       | 552       | 411     | 430     | 402     | 411     | 427     | 282     | 494     | 316     | 324     | 443     | 471     | 422     | 426     | 466     | 434    |
| V                               | 7      | 7         | 81        | 77      | 26      | 29      | 25      | 10      | 6       | 5       | 2<      | 12      | 165     | 171     | 170     | 172     | 170     | 0<     |
| Y                               | 48     | 48        | 31        | 29      | 30      | 31      | 32      | 49      | 34      | 31      | 34      | 34      | 24      | 23      | 24      | 23      | 24      | 45     |
| Zn                              | 111    | 111       | 90        | 106     | 44      | 67      | 44      | 92      | 77      | 38      | 28      | 30      | 127     | 180     | 142     | 101     | 114     | 68     |
| Zr                              | 209    | 209       | 186       | 188     | 238     | 255     | 250     | 141     | 169     | 135     | 174     | 164     | 171     | 169     | 173     | 169     | 173     | 206    |

%H<sub>2</sub>O: water content measured from water loss at 105 °C

LOI: loss on ignition

Σ: sum of elements (excluding %H<sub>2</sub>O and LOI)
